# Supplementary material
Source: PubMed Central journal article supplement (PMC4609032)
Supplement: NIHMS727268-supplement.pdf [file NIHMS727268-supplement.pdf]

## SUPPLEMENTAL DATA

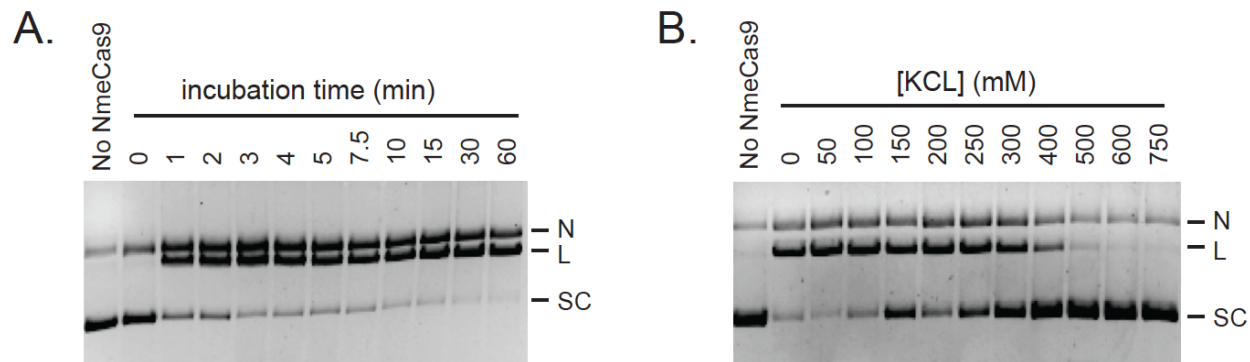

### Figure S1. Biochemical Characterization of NmeCas9-catalyzed Plasmid DNA Cleavage, Related to Figure 1.

A) Time course analysis for NmeCas9 cleavage. Reactions were done as in Fig. 1C. Cleavage by NmeCas9 is rapid under these conditions, nearing completion within five minutes. N, nicked; L, linearized; SC: supercoiled.

B) Effect of salt (KCl) concentration on NmeCas9 cleavage. The optimum KCl concentration for NmeCas9 cleavage is 0-300 mM, while KCl concentrations  $\geq$  400 mM are inhibitory. N, nicked; L, linearized; SC: supercoiled.

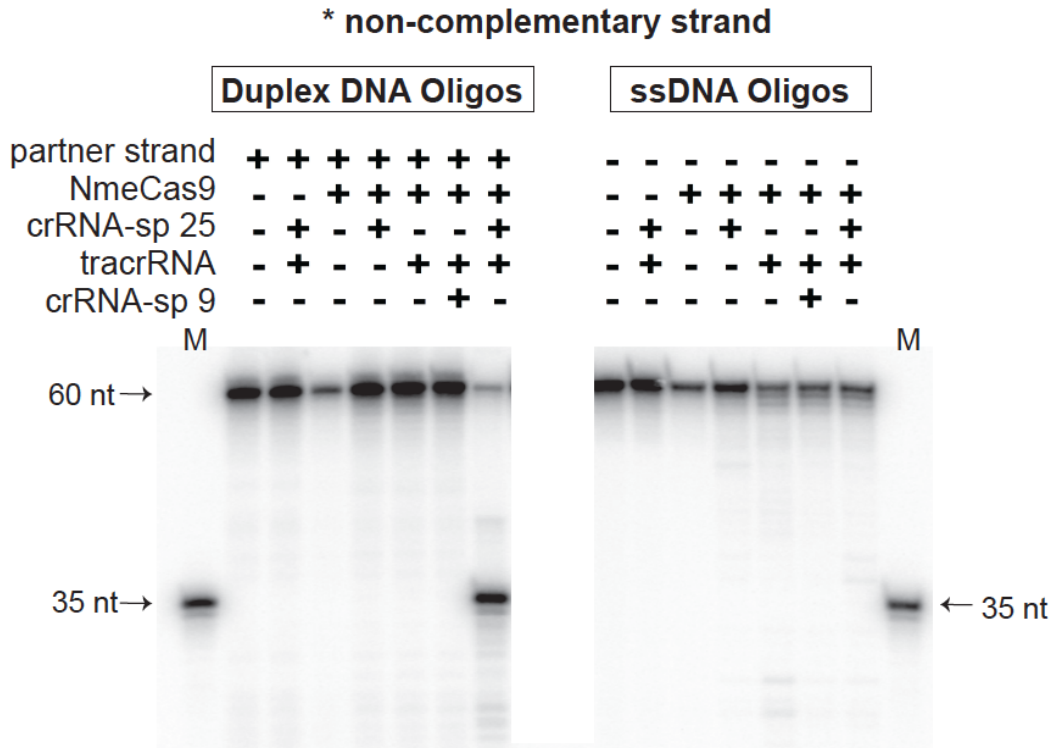

**Figure S2. NmeCas9 Cleavage of the Non-complementary Strand Requires the TracrRNA, Related to Figure 3.**

NmeCas9/RNA complexes were assayed for cleavage of double- (left) or single- (right) stranded DNA substrates bearing a previously verified functional target for sp 25. The non-complementary strand was 5' <sup>32</sup>P-labeled. Reactions were performed as in Fig. 2C. M, size markers. The sizes of the substrates, cleavage products and markers are indicated.

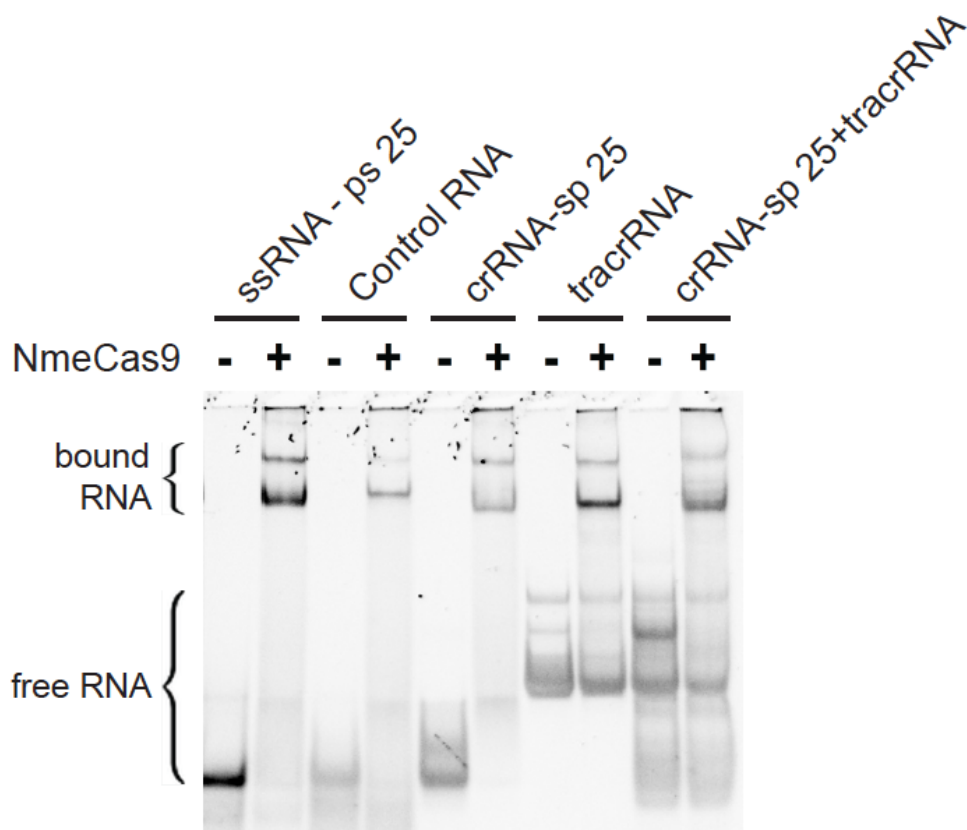

**Figure S3. Promiscuous RNA Binding by NmeCas9, Related to Figure 3.**

Electrophoretic mobility shift assays (EMSAs) were performed using NmeCas9 (500 nM) and various small RNAs (500 nM) as indicated. Binding was performed in cleavage reaction buffer (but with  $Mg^{2+}$  omitted) at room temperature for 10 min, and then resolved by 6% native PAGE. RNAs were visualized by SYBR Gold staining. NmeCas9 binds promiscuously to all RNAs tested. These RNAs include annealed crRNA and tracrRNA, crRNA alone, tracrRNA alone, a ps 25-containing ssRNA “target” (see Fig. 4D, RNA substrate 3), and even a 40-nt control ssRNA (see Table S3) that is unrelated to CRISPR.

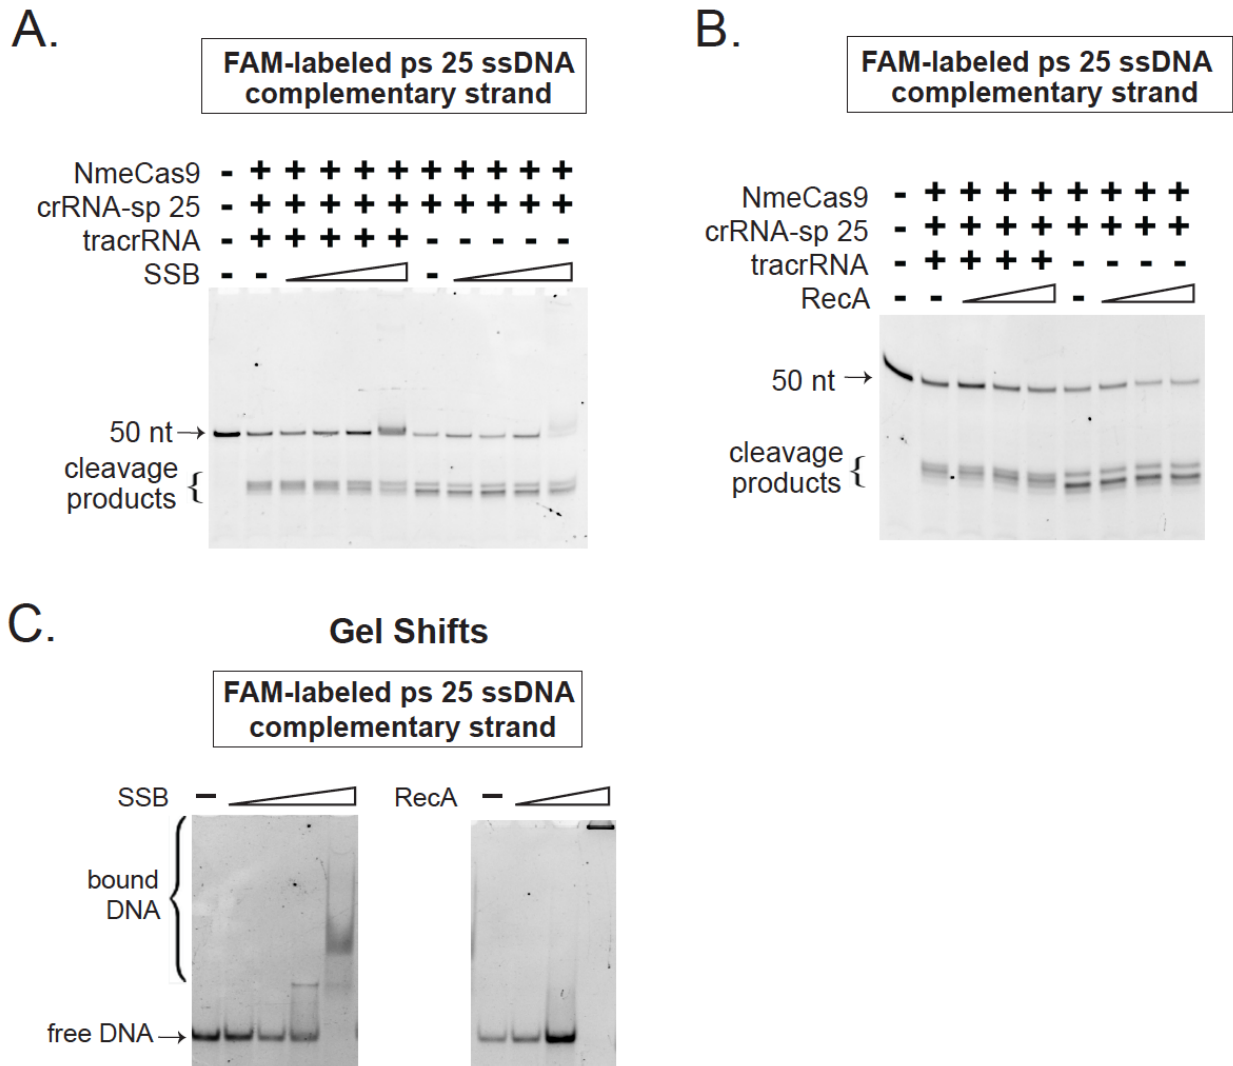

**Figure S4. NmeCas9 Cleaves SsDNA Pre-bound with SSB or RecA Proteins, Related to Figure 3.**

(A, B) NmeCas9 cleaves a FAM-labeled ssDNA target pre-incubated with SSB protein (A) or RecA protein (B), regardless of the presence or absence of tracrRNA. The FAM-labeled ssDNA oligonucleotide was the same as used in Fig. 4, bearing a target for sp 25. Cleavage reactions were performed as for Fig. 4, except that the ssDNA target was pre-incubated with increasing amounts of SSB or RecA in standard cleavage buffer before the addition of crRNA, tracrRNA and NmeCas9. The sizes of the substrates and cleavage products are indicated.

(C) FAM-labeled ssDNA targets are bound by higher concentrations of SSB or RecA after the pre-incubation, as revealed by EMSA.

A.

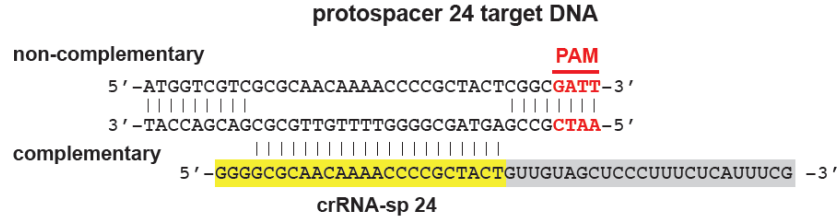

B.

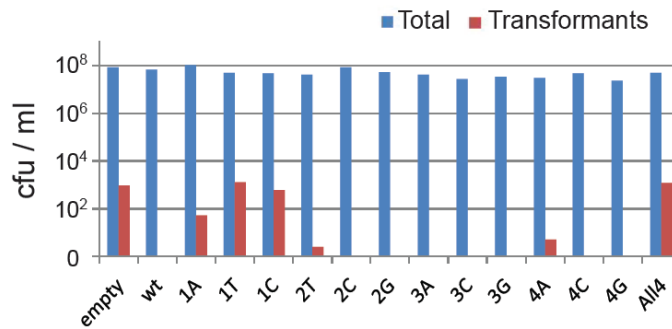

C.

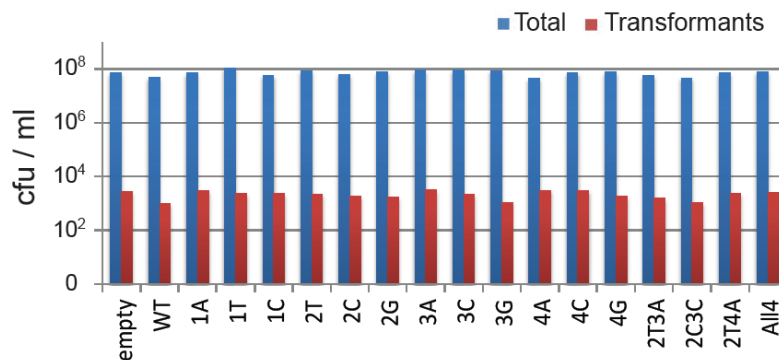

**Figure S5. NmeCas9's Strong Preference for the 1<sup>st</sup> Guanine within PAM is Not a Spacer-specific Effect, Related to Figure 5.**

(A) A schematic of the ps 24-containing DNA targets and sp 24 sgRNA. In red, PAM; highlighted in yellow, crRNA spacer; highlighted in gray, crRNA repeat.

(B) pYZEJS040 derivatives with WT and mismatched targets for sp 24 were tested by natural transformation assays as in Fig. 5B. Experiments were done twice, and the data shown here are from one representative experiment.

(C) Interference Defects for PAM variants are not due to deficiencies in natural transformation. PYZEJS040 derivatives tested in Fig. 5B (all single-nt PAM variants and selected two-nt PAM variants) were analyzed by natural transformation assay using an interference-defective strain of MC8013 (*cas9::Tn*) as the recipient (Zhang et al., 2013). In the absence of CRISPR interference, all pYZEJS040 derivatives tested were as efficiently transformed as the empty vector. Experiments were done twice, and the data shown here are from one representative experiment.

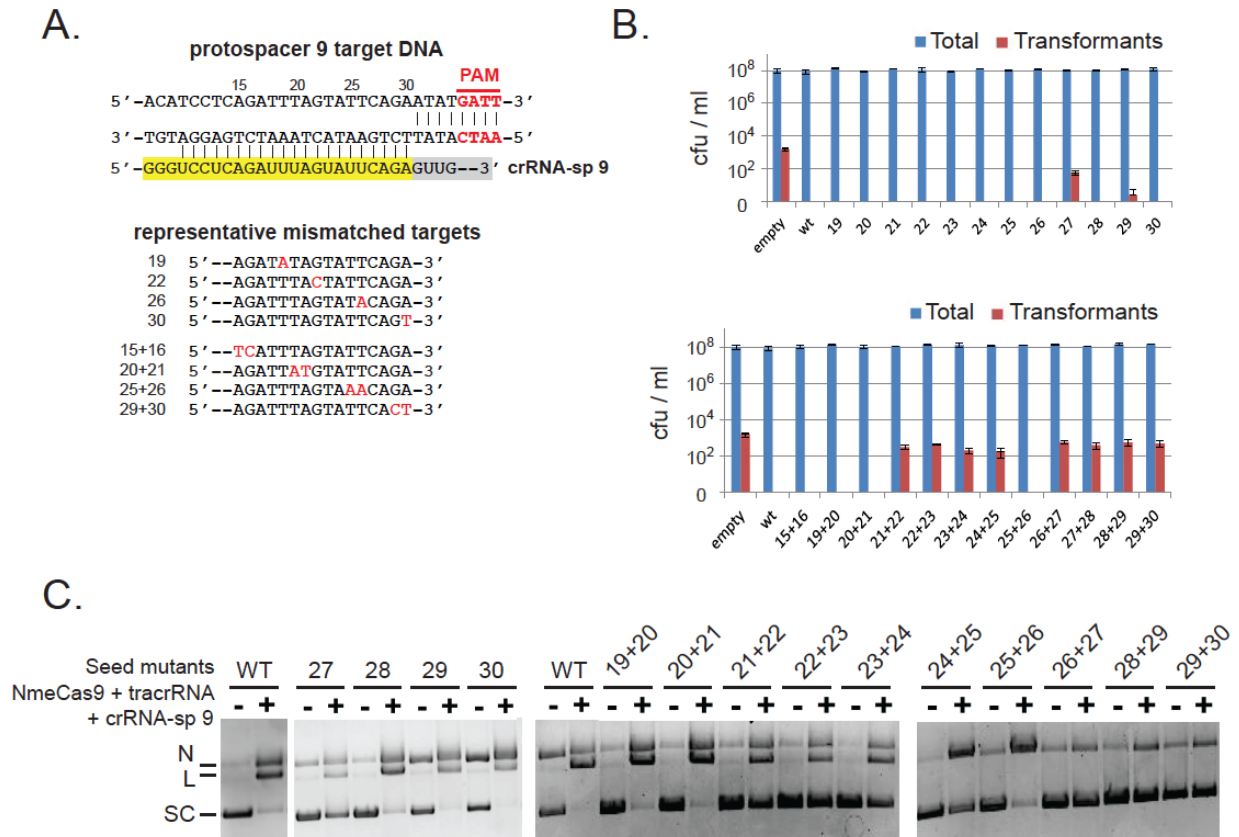

**Figure S6. NmeCas9's Seed Sequence Requirements in Bacterial Cells and *in vitro*, Related to Figure 6.**

(A) A schematic of ps 9-containing DNA targets and sp 9 crRNA. In red, PAM; highlighted in yellow, spacer 9 of the crRNA; highlighted in gray, crRNA repeat. Representative mismatched targets are shown below, with mutations marked in red. Positions of the mutated nts within ps 25 (counting from the PAM-distal end) are indicated on the left.

(B) NmeCas9 tolerates most of the 1-nt but not 2-nt mismatches in the seed region during interference in bacteria. pGCC2 derivatives containing ps 9 with various 1-nt and 2-nt seed mutations were tested by natural transformation assays as in Fig. 5B.

(C) NmeCas9 tolerates many 1-nt but not 2-nt mismatches in the seed region *in vitro*. Representatives of the plasmids tested in (B) were analyzed *in vitro* by a plasmid cleavage assay using NmeCas9, sp 9 crRNA, and tracrRNA. Reactions were performed as in Fig. 1C. N, nicked; L, linearized; SC: supercoiled.

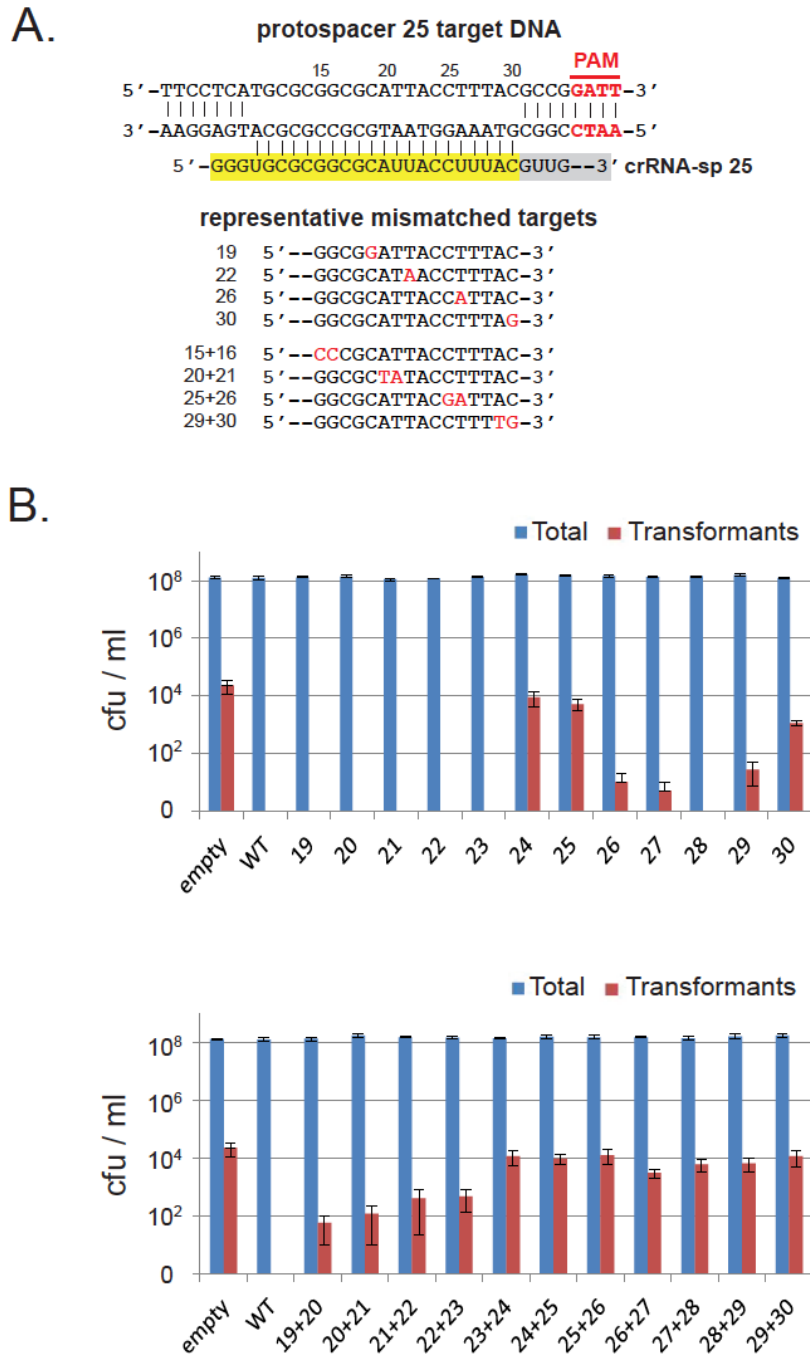

**Figure S7. NmeCas9's Seed Sequence Requirements in Bacterial Cells are not Spacer Context-dependent, Related to Figure 6.**

(A) A Schematic of ps 25-containing DNA targets and sp 25 crRNA. In red, PAM; highlighted in yellow, crRNA spacer; highlighted in gray, crRNA repeat. Representative mismatched targets are shown below, with mismatches marked in red and positions of the mutated nts indicated on the left.

(B) NmeCas9 tolerates many 1-nt but not 2-nt mismatches in the seed region of protospacer 25 during interference in bacteria. pYZEJS040 derivatives containing ps 25 with various 1-nt and 2-nt seed mutations were assayed for interference using natural transformation as in Fig. 5B.

**Table S1. Bacterial strains used in this study, related to Figures 5-7, and S5-S7.**

| <b>Strain names</b>         | <b>Relevant genotypes</b>                                                    | <b>Source</b>                   |
|-----------------------------|------------------------------------------------------------------------------|---------------------------------|
| <i>N. meningitidis</i> 8013 | Wild type                                                                    | Dr. Hank Seifert lab collection |
|                             | $\Delta$ <i>crispr</i> $\Delta$ <i>tracr</i>                                 | This study                      |
|                             | $\Delta$ <i>crispr</i> $\Delta$ <i>tracr</i> /pGCC2                          | This study                      |
|                             | $\Delta$ <i>crispr</i> $\Delta$ <i>tracr</i> /pGCC2-Sp25 sgRNA FL            | This study                      |
|                             | $\Delta$ <i>crispr</i> $\Delta$ <i>tracr</i> /pGCC2-Sp25 sgRNA $\Delta$ 7nt  | This study                      |
|                             | $\Delta$ <i>crispr</i> $\Delta$ <i>tracr</i> /pGCC2-Sp25 sgRNA $\Delta$ 14nt | This study                      |
|                             | $\Delta$ <i>crispr</i> $\Delta$ <i>tracr</i> /pGCC2-Sp25 sgRNA $\Delta$ 22nt | This study                      |
|                             | $\Delta$ <i>crispr</i> $\Delta$ <i>tracr</i> /pGCC2-Sp25 sgRNA $\Delta$ 45nt | This study                      |
|                             | $\Delta$ <i>crispr</i> $\Delta$ <i>tracr</i> /pGCC2-Sp25 sgRNA $\Delta$ 57nt | This study                      |
|                             | $\Delta$ <i>crispr</i> $\Delta$ <i>tracr</i> /pGCC2-Sp25 sgRNA $\Delta$ 69nt | This study                      |
|                             | $\Delta$ <i>crispr</i> $\Delta$ <i>tracr</i> /pGCC2-Sp25 sgRNA int1          | This study                      |
|                             | $\Delta$ <i>crispr</i> $\Delta$ <i>tracr</i> /pGCC2-Sp25 sgRNA int2          | This study                      |
|                             | $\Delta$ <i>crispr</i> $\Delta$ <i>tracr</i> /pGCC2-Sp25 sgRNA int3          | This study                      |
|                             | <i>cas9</i> :: <i>Tn</i>                                                     | Zhang <i>et al.</i> , 2013      |



**Table S2. Plasmids used in this study for strain creation and in vitro assays, related to Figures 1, 2, 5A, 7, S1, and S6.**

| Plasmids                                                                                                                | Relevant characteristics                | Source                          |
|-------------------------------------------------------------------------------------------------------------------------|-----------------------------------------|---------------------------------|
| <b>Plasmids for creating the <i>ΔcrisprAtracr</i> strain used in Fig. 7</b>                                             |                                         |                                 |
| pYZEJS067                                                                                                               | pSmartHCamp/ <i>Δcrispr</i> / Sall+SpeI | This study                      |
| pYZEJS068                                                                                                               | pSmartHCamp/ <i>Δcrispr</i> / CAT+rpsL  | This study                      |
| <b>Plasmids for creating the <i>sgRNA</i> complementation strains in <i>ΔcrisprAtracr</i> background used in Fig. 7</b> |                                         |                                 |
| pYZEJS001                                                                                                               | pGCC2 empty                             | Dr. Hank Seifert lab collection |
| pYZEJS079                                                                                                               | pGCC2/promoter+Sp25 sgRNA FL            | This study                      |
| pYZEJS162                                                                                                               | pGCC2/promoter+Sp25 sgRNA Δ22nt         | This study                      |
| pYZEJS163                                                                                                               | pGCC2/promoter+Sp25 sgRNA Δ45nt         | This study                      |
| pYZEJS164                                                                                                               | pGCC2/promoter+Sp25 sgRNA Δ57nt         | This study                      |
| pYZEJS165                                                                                                               | pGCC2/promoter+Sp25 sgRNA Δ69nt         | This study                      |
| pYZEJS175                                                                                                               | pGCC2/promoter+Sp25 sgRNA Δ7nt          | This study                      |
| pYZEJS176                                                                                                               | pGCC2/promoter+Sp25 sgRNA Δ14nt         | This study                      |
| pYZEJS177                                                                                                               | pGCC2/promoter+Sp25 sgRNA int1          | This study                      |
| pYZEJS178                                                                                                               | pGCC2/promoter+Sp25 sgRNA int2          | This study                      |
| pYZEJS179                                                                                                               | pGCC2/promoter+Sp25 sgRNA int3          | This study                      |
| <b>Plasmids for purification of NmeCas9 proteins</b>                                                                    |                                         |                                 |
| pYZEJS265                                                                                                               | pMCSG7/NmeCas9 wt                       | This study                      |
| pYZEJS266                                                                                                               | pMCSG7/NmeCas9 D16A                     | This study                      |
| pYZEJS267                                                                                                               | pMCSG7/NmeCas9 H588                     | This study                      |
| pYZEJS268                                                                                                               | pMCSG7/NmeCas9 D16A+H588A (dm)          | This study                      |
| <b>Plasmids for <i>in vitro</i> cleavage in Figs. 1, 2, 5A, S1, S6 (also used in interference assays in Fig. S6)</b>    |                                         |                                 |
| pYZEJS012                                                                                                               | pGCC2/protospacer 9 wt                  | Zhang <i>et al.</i> , 2013      |
| pYZEJS095                                                                                                               | pGCC2/protospacer 9 1C                  | This study                      |
| pYZEJS096                                                                                                               | pGCC2/protospacer 9 2T                  | This study                      |
| pYZEJS097                                                                                                               | pGCC2/protospacer 9 3A                  | This study                      |
| pYZEJS098                                                                                                               | pGCC2/protospacer 9 4A                  | This study                      |
| pYZEJS023                                                                                                               | pGCC2/protospacer 9 2T3A                | Zhang <i>et al.</i> , 2013      |
| pYZEJS147                                                                                                               | pGCC2/protospacer 9 seed 19             | This study                      |
| pYZEJS148                                                                                                               | pGCC2/protospacer 9 seed 20             | This study                      |
| pYZEJS149                                                                                                               | pGCC2/protospacer 9 seed 21             | This study                      |
| pYZEJS150                                                                                                               | pGCC2/protospacer 9 seed 22             | This study                      |
| pYZEJS151                                                                                                               | pGCC2/protospacer 9 seed 23             | This study                      |
| pYZEJS152                                                                                                               | pGCC2/protospacer 9 seed 24             | This study                      |
| pYZEJS153                                                                                                               | pGCC2/protospacer 9 seed 25             | This study                      |
| pYZEJS154                                                                                                               | pGCC2/protospacer 9 seed 26             | This study                      |
| pYZEJS155                                                                                                               | pGCC2/protospacer 9 seed 27             | This study                      |
| pYZEJS156                                                                                                               | pGCC2/protospacer 9 seed 28             | This study                      |
| pYZEJS157                                                                                                               | pGCC2/protospacer 9 seed 29             | This study                      |
| pYZEJS158                                                                                                               | pGCC2/protospacer 9 seed 30             | This study                      |
| pYZEJS020                                                                                                               | pGCC2/protospacer 9 seed 15+16          | Zhang <i>et al.</i> , 2013      |
| pYZEJS181                                                                                                               | pGCC2/protospacer 9 seed 19+20          | This study                      |
| pYZEJS182                                                                                                               | pGCC2/protospacer 9 seed 20+21          | This study                      |
| pYZEJS183                                                                                                               | pGCC2/protospacer 9 seed 21+22          | This study                      |
| pYZEJS184                                                                                                               | pGCC2/protospacer 9 seed 22+23          | This study                      |
| pYZEJS185                                                                                                               | pGCC2/protospacer 9 seed 23+24          | This study                      |
| pYZEJS186                                                                                                               | pGCC2/protospacer 9 seed 24+25          | This study                      |
| pYZEJS187                                                                                                               | pGCC2/protospacer 9 seed 25+26          | This study                      |
| pYZEJS188                                                                                                               | pGCC2/protospacer 9 seed 26+27          | This study                      |
| pYZEJS021                                                                                                               | pGCC2/protospacer 9 seed 27+28          | Zhang <i>et al.</i> , 2013      |
| pYZEJS189                                                                                                               | pGCC2/protospacer 9 seed 28+29          | This study                      |
| pYZEJS190                                                                                                               | pGCC2/protospacer 9 seed 29+30          | This study                      |

**Table S3. Plasmids used in this study for interference assays, related to Figures 5, 6, S5, and S7.**

| Plasmids                                                                             | Relevant characteristics                          | Source                     |
|--------------------------------------------------------------------------------------|---------------------------------------------------|----------------------------|
| <b>Plasmids for interference assays in Fig. 5B and Fig. S5C</b>                      |                                                   |                            |
| pYZEJS040                                                                            | pSTblue-1/ <i>siaA</i> + <i>CAT</i> + <i>ctrA</i> | Zhang <i>et al.</i> , 2013 |
| pYZEJS101                                                                            | pYZEJS040-protospacer25 wt (short)                | This study                 |
| pYZEJS102                                                                            | pYZEJS040-protospacer25 1A                        | This study                 |
| pYZEJS103                                                                            | pYZEJS040-protospacer25 1T                        | This study                 |
| pYZEJS104                                                                            | pYZEJS040-protospacer25 1C                        | This study                 |
| pYZEJS105                                                                            | pYZEJS040-protospacer25 2T                        | This study                 |
| pYZEJS106                                                                            | pYZEJS040-protospacer25 2C                        | This study                 |
| pYZEJS107                                                                            | pYZEJS040-protospacer25 2G                        | This study                 |
| pYZEJS108                                                                            | pYZEJS040-protospacer25 3A                        | This study                 |
| pYZEJS109                                                                            | pYZEJS040-protospacer25 3C                        | This study                 |
| pYZEJS110                                                                            | pYZEJS040-protospacer25 3G                        | This study                 |
| pYZEJS111                                                                            | pYZEJS040-protospacer25 4A                        | This study                 |
| pYZEJS112                                                                            | pYZEJS040-protospacer25 4C                        | This study                 |
| pYZEJS113                                                                            | pYZEJS040-protospacer25 4G                        | This study                 |
| pYZEJS114                                                                            | pYZEJS040-protospacer25 2T3A                      | This study                 |
| pYZEJS115                                                                            | pYZEJS040-protospacer25 1C2T3A4A                  | This study                 |
| pYZEJS116                                                                            | pYZEJS040-protospacer25 2C3C                      | This study                 |
| pYZEJS117                                                                            | pYZEJS040-protospacer25 2T4A                      | This study                 |
| pYZEJS118                                                                            | pYZEJS040-protospacer25 2C4C                      | This study                 |
| pYZEJS119                                                                            | pYZEJS040-protospacer25 3A4A                      | This study                 |
| pYZEJS120                                                                            | pYZEJS040-protospacer25 3C4C                      | This study                 |
| pYZEJS121                                                                            | pYZEJS040-protospacer25 2T3A4A                    | This study                 |
| pYZEJS122                                                                            | pYZEJS040-protospacer25 2C3C4C                    | This study                 |
| pYZEJS125                                                                            | pYZEJS040-protospacer25 2T3C                      | This study                 |
| pYZEJS126                                                                            | pYZEJS040-protospacer25 2T3G                      | This study                 |
| pYZEJS127                                                                            | pYZEJS040-protospacer25 2C3A                      | This study                 |
| pYZEJS128                                                                            | pYZEJS040-protospacer25 2C3G                      | This study                 |
| pYZEJS129                                                                            | pYZEJS040-protospacer25 2G3A                      | This study                 |
| pYZEJS130                                                                            | pYZEJS040-protospacer25 2G3C                      | This study                 |
| pYZEJS131                                                                            | pYZEJS040-protospacer25 2G3G                      | This study                 |
| pYZEJS132                                                                            | pYZEJS040-protospacer25 2T4C                      | This study                 |
| pYZEJS133                                                                            | pYZEJS040-protospacer25 2T4G                      | This study                 |
| pYZEJS134                                                                            | pYZEJS040-protospacer25 2C4A                      | This study                 |
| pYZEJS135                                                                            | pYZEJS040-protospacer25 2C4G                      | This study                 |
| pYZEJS136                                                                            | pYZEJS040-protospacer25 2G4A                      | This study                 |
| pYZEJS137                                                                            | pYZEJS040-protospacer25 2G4C                      | This study                 |
| pYZEJS138                                                                            | pYZEJS040-protospacer25 2G4G                      | This study                 |
| pYZEJS139                                                                            | pYZEJS040-protospacer25 3A4C                      | This study                 |
| pYZEJS140                                                                            | pYZEJS040-protospacer25 3A4G                      | This study                 |
| pYZEJS141                                                                            | pYZEJS040-protospacer25 3C4A                      | This study                 |
| pYZEJS142                                                                            | pYZEJS040-protospacer25 3C4G                      | This study                 |
| pYZEJS143                                                                            | pYZEJS040-protospacer25 3G4A                      | This study                 |
| pYZEJS144                                                                            | pYZEJS040-protospacer25 3G4C                      | This study                 |
| pYZEJS145                                                                            | pYZEJS040-protospacer25 3G4G                      | This study                 |
| pYZEJS146                                                                            | pYZEJS040-protospacer25 2G3G4G                    | This study                 |
| <b>Plasmids for interference assay and <i>in vitro</i> cleavage assays in Fig. 6</b> |                                                   |                            |
| pYZEJS241                                                                            | pYZEJS040-protospacer23-lk1                       | This study                 |
| pYZEJS242                                                                            | pYZEJS040-protospacer23-lk2                       | This study                 |
| pYZEJS243                                                                            | pYZEJS040-protospacer23-lk3                       | This study                 |
| pYZEJS244                                                                            | pYZEJS040-protospacer23-lk4                       | This study                 |
| pYZEJS245                                                                            | pYZEJS040-protospacer23-lk5                       | This study                 |
| pYZEJS246                                                                            | pYZEJS040-protospacer23-lk6                       | This study                 |
| pYZEJS247                                                                            | pYZEJS040-protospacer23-lk7                       | This study                 |

|                                                    |                                    |            |
|----------------------------------------------------|------------------------------------|------------|
| pYZEJS248                                          | pYZEJS040-protospacer23-lk8        | This study |
| <b>Plasmids for interference assay in Fig. S5B</b> |                                    |            |
| pYZEJS070                                          | pYZEJS040-protospacer24 wt         | This study |
| pYZEJS081                                          | pYZEJS040-protospacer24 1A         | This study |
| pYZEJS082                                          | pYZEJS040-protospacer24 1T         | This study |
| pYZEJS083                                          | pYZEJS040-protospacer24 1C         | This study |
| pYZEJS084                                          | pYZEJS040-protospacer24 2T         | This study |
| pYZEJS085                                          | pYZEJS040-protospacer24 2C         | This study |
| pYZEJS086                                          | pYZEJS040-protospacer24 2G         | This study |
| pYZEJS087                                          | pYZEJS040-protospacer24 3A         | This study |
| pYZEJS088                                          | pYZEJS040-protospacer24 3C         | This study |
| pYZEJS089                                          | pYZEJS040-protospacer24 3G         | This study |
| pYZEJS090                                          | pYZEJS040-protospacer24 4A         | This study |
| pYZEJS091                                          | pYZEJS040-protospacer24 4C         | This study |
| pYZEJS092                                          | pYZEJS040-protospacer24 4G         | This study |
| pYZEJS094                                          | pYZEJS040-protospacer24 1C2T3A4A   | This study |
| <b>Plasmids for interference assays in Fig. S7</b> |                                    |            |
| pYZEJS192                                          | pYZEJS040-protospacer25 seed 19    | This study |
| pYZEJS193                                          | pYZEJS040-protospacer25 seed 20    | This study |
| pYZEJS194                                          | pYZEJS040-protospacer25 seed 21    | This study |
| pYZEJS195                                          | pYZEJS040-protospacer25 seed 22    | This study |
| pYZEJS196                                          | pYZEJS040-protospacer25 seed 23    | This study |
| pYZEJS197                                          | pYZEJS040-protospacer25 seed 24    | This study |
| pYZEJS198                                          | pYZEJS040-protospacer25 seed 25    | This study |
| pYZEJS199                                          | pYZEJS040-protospacer25 seed 26    | This study |
| pYZEJS200                                          | pYZEJS040-protospacer25 seed 27    | This study |
| pYZEJS201                                          | pYZEJS040-protospacer25 seed 28    | This study |
| pYZEJS202                                          | pYZEJS040-protospacer25 seed 29    | This study |
| pYZEJS203                                          | pYZEJS040-protospacer25 seed 30    | This study |
| pYZEJS208                                          | pYZEJS040-protospacer25 seed 19+20 | This study |
| pYZEJS209                                          | pYZEJS040-protospacer25 seed 20+21 | This study |
| pYZEJS210                                          | pYZEJS040-protospacer25 seed 21+22 | This study |
| pYZEJS211                                          | pYZEJS040-protospacer25 seed 22+23 | This study |
| pYZEJS212                                          | pYZEJS040-protospacer25 seed 23+24 | This study |
| pYZEJS213                                          | pYZEJS040-protospacer25 seed 24+25 | This study |
| pYZEJS214                                          | pYZEJS040-protospacer25 seed 25+26 | This study |
| pYZEJS215                                          | pYZEJS040-protospacer25 seed 26+27 | This study |
| pYZEJS216                                          | pYZEJS040-protospacer25 seed 27+28 | This study |
| pYZEJS217                                          | pYZEJS040-protospacer25 seed 28+29 | This study |
| pYZEJS218                                          | pYZEJS040-protospacer25 seed 29+30 | This study |

**Table S4. Oligonucleotides used in this study for in vitro cleavage/binding assays, related to Figures 2-6 and S2-S4.**

| Oligo Name                                                                                | (a) | Sequence, 5'-3' <sup>(b)</sup>                                                                                                | Purpose                                                        |
|-------------------------------------------------------------------------------------------|-----|-------------------------------------------------------------------------------------------------------------------------------|----------------------------------------------------------------|
| <b>For generating in vitro transcription templates by annealing (T7 promoter in bold)</b> |     |                                                                                                                               |                                                                |
| T7-tracrRNA Forw                                                                          | F   | <b>TAATACGACTCACTATA</b> GAAATGAGAACCGTTGCTAC<br>AATAAGGCCGTCTGAAAAGATGTGCCGCAACGCTCTG<br>CCCCTTAAAGCTTCTGCTTTAAGGGGCATCGTTTA | TracrRNA<br>(Hou et al., 2013)                                 |
| T7-tracrRNA AS                                                                            | R   | TAAACGATGCCCTTAAAGCAGAAGCTTTAAGGGGCA<br>GAGCGTTGCGGCACATCTTTTCAGACGGCCTTATTGT<br>AGCAACGGTTCTCATTCT <b>TATAGTGAGTCGTATTA</b>  |                                                                |
| T7-Sp25-R Forw                                                                            | F   | <b>TAATACGACTCACTATA</b> GGGTGCGCGGCATTACCT<br>TTACGTTGTAGCTCCCTTCTCATTTCG                                                    | CrRNA-sp25                                                     |
| T7-Sp25-R AS                                                                              | R   | CGAAATGAGAAAGGGAGCTACAACGTAAAGGTAATGC<br>GCCGCGCACCC <b>TATAGTGAGTCGTATTA</b>                                                 |                                                                |
| T7-Sp9-R Forw                                                                             | F   | <b>TAATACGACTCACTATA</b> GGGTCTCAGATTTAGTATTC<br>AGA GTTGTAGCTCCCTTCTCATTTCG                                                  | CrRNA-sp9                                                      |
| T7-Sp9-R AS                                                                               | R   | CGAAATGAGAAAGGGAGCTACAACCTGAATACTAAAT<br>CTGAGGACCC <b>TATAGTGAGTCGTATTA</b>                                                  |                                                                |
| T7-Sp23-R Forw                                                                            | F   | <b>TAATACGACTCACTATA</b> GGGTTTCATGGCGGTTCTT<br>GCTG GTTGTAGCTCCCTTCTCATTTCG                                                  | CrRNA-sp23                                                     |
| T7-Sp23-R AS                                                                              | R   | CGAAATGAGAAAGGGAGCTACAACCAGAGAAGCG<br>GCCATGAAACCC <b>TATAGTGAGTCGTATTA</b>                                                   |                                                                |
| T7-Sp25-12nt R Forw                                                                       | F   | <b>TAATACGACTCACTATA</b> GGGTGCGCGGCATTACCT<br>TTACGTTGTAGCTCCC                                                               | CrRNA-sp25 12nt<br>R                                           |
| T7-Sp25-12nt R AS                                                                         | R   | GGGAGCTACAACGTAAAGGTAATGCGCCGCGCACCC<br><b>TATAGTGAGTCGTATTA</b>                                                              |                                                                |
| T7-Sp25-8nt R Forw                                                                        | F   | <b>TAATACGACTCACTATA</b> GGGTGCGCGGCATTACCT<br>TTACGTTGTAGC                                                                   | CrRNA-sp25 8nt R                                               |
| T7-Sp25-8nt R AS                                                                          | R   | GCTACAACGTAAAGGTAATGCGCCGCGCACCC <b>TATAGTGAGTCGTATTA</b>                                                                     |                                                                |
| T7-Sp25-4nt R Forw                                                                        | F   | <b>TAATACGACTCACTATA</b> GGGTGCGCGGCATTACCT<br>TTACGTTG                                                                       | CrRNA-sp25 4nt R                                               |
| T7-Sp25-4nt R AS                                                                          | R   | CAACGTAAAGGTAATGCGCCGCGCACCC <b>TATAGTGAGTCGTATTA</b>                                                                         |                                                                |
| T7-Sp25-0nt R Forw                                                                        | F   | <b>TAATACGACTCACTATA</b> GGGTGCGCGGCATTACCT<br>TTAC                                                                           | CrRNA-sp25 0nt R                                               |
| T7-Sp25-0nt RAS                                                                           | R   | GTAAAGGTAATGCGCCGCGCACCC <b>TATAGTGAGTCGTATTA</b>                                                                             |                                                                |
| T7-Sp25-Sp.R Forw                                                                         | F   | <b>TAATACGACTCACTATA</b> GGGTGCGCGGCATTACCT<br>TTACGTTTTAGAGCTATGCTGTTTTG                                                     | CrRNA-sp25 Sp.R                                                |
| T7-Sp25-Sp.R AS                                                                           | R   | CAAAACAGCATAGCTCTAAAACGTAAAGGTAATGCGC<br>CGCGCACCC <b>TATAGTGAGTCGTATTA</b>                                                   |                                                                |
| T7-Sp25-0nt R+3'Δ5nt F                                                                    | F   | <b>TAATACGACTCACTATA</b> GGGTGCGCGGCATTACC                                                                                    | CrRNA-sp25<br>0nt R+3'Δ5nt                                     |
| T7-Sp25-0nt R+3'Δ5nt AS                                                                   | R   | GGTAATGCGCCGCGCACCC <b>TATAGTGAGTCGTATTA</b>                                                                                  |                                                                |
| T7-Sp25-0nt R+3'Δ5nt+5' 2nt extension F                                                   | F   | <b>TAATACGACTCACTATA</b> GGGCATGCGCGGCATTAC<br>C                                                                              | CrRNA-sp25<br>0nt R+3'Δ5nt+5'<br>2nt extension                 |
| T7-Sp25-0nt R+3'Δ5nt+5' 2nt extension AS                                                  | R   | GGTAATGCGCCGCGCATGCC <b>TATAGTGAGTCGTATTA</b>                                                                                 |                                                                |
| T7-Sp25-0nt R+3'Δ5nt+5' 3nt extension F                                                   | F   | <b>TAATACGACTCACTATA</b> GGGGCATGCGCGGCATT<br>ACC                                                                             | CrRNA-sp25<br>0nt R+3'Δ5nt+5'<br>3nt extension                 |
| T7-Sp25-0nt R+3'Δ5nt+5' 3nt extension AS                                                  | R   | GGTAATGCGCCGCGCATGCC <b>TATAGTGAGTCGTATTA</b>                                                                                 |                                                                |
| T7-Sp25-0nt R+5' 5nt extension F                                                          | F   | <b>TAATACGACTCACTATA</b> GGGCCGCGCATGCGCGGC<br>TTACCTTAC                                                                      | CrRNA-sp25<br>0nt R+5' 5nt<br>extension                        |
| T7-Sp25-0nt R+5' 5nt extension AS                                                         | R   | GTAAAGGTAATGCGCCGCGCATGCGGCC <b>TATAGTGAGTCGTATTA</b>                                                                         |                                                                |
| T7-Sp25-0nt R+3' 10nt extension F                                                         | F   | <b>TAATACGACTCACTATA</b> GGGTGCGCGGCATTACCT<br>TTACATATGATTAT                                                                 | CrRNA-sp25<br>0nt R+3' 10nt<br>extension                       |
| T7-Sp25-0nt R+3' 10nt extension AS                                                        | R   | ATAATCATATGTAAAGGTAATGCGCCGCGCACCC <b>TATAGTGAGTCGTATTA</b>                                                                   |                                                                |
| T7- C RNA target 25 Forw                                                                  | F   | CAAGTCT <b>TAATACGACTCACTATA</b> GGGTCAGCACGGCC<br>AGCAATCCGGCGTAAAGGTAATGCGCCGCGCATGAG<br>GAATAAAAACTCG                      | To generate<br>ssRNA bearing<br>sequence<br>antisense to sp25. |
| T7- C RNA target 25 AS                                                                    | R   | CAGATTTTTATTCTCATGCGCGGCATTACCTTAC<br>GCCGATTGCTGGCCGTGCTGACCC <b>TATAGTGAGTC</b>                                             |                                                                |

|                                                                                              |   | GTATTAGACTTG                                                             |                                        |
|----------------------------------------------------------------------------------------------|---|--------------------------------------------------------------------------|----------------------------------------|
| <b>For in vitro cleavage/binding assays (Mutations, in red; PAMs, highlighted in grey.)</b>  |   |                                                                          |                                        |
| Sp25-NC (Non Complementary strand)                                                           | F | CAGATTTTTATTCCCTCATGCGCGGCGCATTACCTTTACGCCGATTGCTGGCCGTGCTGA             | For Figs. 2C, 3B, 3D, 5C, & S2.        |
| Sp25-C (Complementary strand)                                                                | R | TCAGCACGGCCAGCAATCCGGCGTAAAGGTAATGCGCCGCGCATGAGGAATAAAAAATCTG            |                                        |
| Sp25-NC PAM Mut                                                                              | F | CAGATTTTTATTCCCTCATGCGCGGCGCATTACCTTTACGCC <b>CTAA</b> GCTGGCCGTGCTGA    | For Figs. 5C                           |
| Sp25-C PAM Mut                                                                               | R | TCAGCACGGCCAGC <b>TTAG</b> CGGCGTAAAGGTAATGCGCCGCGCATGAGGAATAAAAAATCTG   |                                        |
| FAM- sp25-C                                                                                  | R | /56-FAM/ATTCAGCACGGCATATAATCATATGTAAAGGTAATGCGCCGCGCATGCGG               | For Figs. 3C, 4A-D, 5D, & S4.          |
| FAM- sp25-C NO PAM                                                                           | R | /56-FAM/ATTCAGCACGGCATATA <b>TAG</b> ATATGTAAAGGTAATGCGCCGCGCATGCGG      |                                        |
| CrDNA25                                                                                      | F | TCATGCGCGGCGCATTACCTTTACGTTGTAGCTCCCTTCTCATTTCG                          | For Fig. 4D.                           |
| FAM-extended crDNA25                                                                         | F | /56-FAM/CCACCTGCTGAAGGAATAGTGC GCGGCGCATACCTTTACGTTGTAGCTCCCTTTCTCATTTCG |                                        |
| Control RNA                                                                                  | - | AAGTTTGAAGGTGATACCCTTGTTAATAGAATCGAGTTAA                                 |                                        |
| Sp25-LK6-NC                                                                                  | F | CAGATTTTTATTCCCTCATGCGCGGCGCATTACCTTTACATATAGATTGCTGGCCGTGCT             | For Figs. 6C & 6D.                     |
| Sp25-LK6-C                                                                                   | R | AGCACGGCCAGCAATCATATATGTAAAGGTAATGCGCCGCGCATGAGGAATAAAAAATCTG            |                                        |
| Sp25-LK5-NC                                                                                  | F | CAGATTTTTATTCCCTCATGCGCGGCGCATTACCTTTACATATAGATTGCTGGCCGTGCT             |                                        |
| Sp25-LK5-C                                                                                   | R | CAGCACGGCCAGCAATCTATATGTAAAGGTAATGCGCCGCGCATGAGGAATAAAAAATCTG            |                                        |
| Sp25-LK4-NC                                                                                  | F | CAGATTTTTATTCCCTCATGCGCGGCGCATTACCTTTACATATAGATTGCTGGCCGTGCTGA           |                                        |
| Sp25-LK4-C                                                                                   | R | TCAGCACGGCCAGCAATCATATGTAAAGGTAATGCGCCGCGCATGAGGAATAAAAAATCTG            |                                        |
| Sp25-LK3-NC                                                                                  | F | CAGATTTTTATTCCCTCATGCGCGGCGCATTACCTTTACATAGATTGCTGGCCGTGCTGAA            |                                        |
| Sp25-LK3-C                                                                                   | R | TTCAGCACGGCCAGCAATCTATGTAAAGGTAATGCGCCGCGCATGAGGAATAAAAAATCTG            |                                        |
| Sp25-LK2-NC                                                                                  | F | CAGATTTTTATTCCCTCATGCGCGGCGCATTACCTTTACATGATTGCTGGCCGTGCTGAAG            |                                        |
| Sp25-LK2-C                                                                                   | R | CTTCAGCACGGCCAGCAATCATGTAAAGGTAATGCGCCGCGCATGAGGAATAAAAAATCTG            |                                        |
| 37nt NCsp25                                                                                  | F | CAGATTTTTATTCCCTCATGCGCGGCGCATTACCTTTA                                   | Size markers for oligo cleavage assays |
| 36nt NCsp25                                                                                  | F | CAGATTTTTATTCCCTCATGCGCGGCGCATTACCTTT                                    |                                        |
| 35nt NCsp25                                                                                  | F | CAGATTTTTATTCCCTCATGCGCGGCGCATTACCTT                                     |                                        |
| 34nt NCsp25                                                                                  | F | CAGATTTTTATTCCCTCATGCGCGGCGCATTACCT                                      |                                        |
| 33nt NCsp25                                                                                  | F | CAGATTTTTATTCCCTCATGCGCGGCGCATTACCT                                      |                                        |
| 25nt Csp25                                                                                   | R | TCAGCACGGCCAGCAATCCGGCGTA                                                |                                        |
| 24nt Csp25                                                                                   | R | TCAGCACGGCCAGCAATCCGGCGT                                                 |                                        |
| 22nt Csp25                                                                                   | R | TCAGCACGGCCAGCAATCCGGC                                                   |                                        |
| <sup>(a)</sup> F, Forward; R, Reverse.                                                       |   |                                                                          |                                        |
| <sup>(b)</sup> <b>Bold</b> , T7 promoter; highlighted in grey, PAMs; <b>red</b> , mutations. |   |                                                                          |                                        |

**Table S5. Oligonucleotides used in this study for protein purification, strain creation and interference assay, related to Figures 1, 5-7, and S5-S7.**

| Oligo Name                                                                                                                                                                                                          | <sup>(a)</sup> | Sequence, 5'-3'                                        | Purpose                   |
|---------------------------------------------------------------------------------------------------------------------------------------------------------------------------------------------------------------------|----------------|--------------------------------------------------------|---------------------------|
| <b>To construct plasmids for strain creation and protein expression</b>                                                                                                                                             |                |                                                        |                           |
| CR US Forw                                                                                                                                                                                                          | F              | GCCTGCATTAGGCTTGTTTCATAG                               | For pYZEJS067             |
| CR US AS+SallSpeI                                                                                                                                                                                                   | R              | ACTAGTATAGTCGACACTTCGACGGGAAATCCTTATTT<br>C            |                           |
| SallSpeI +CR DS Forw                                                                                                                                                                                                | F              | TCGACTATACTAGTCAGCCGTTGCGATAAGCGAAC                    |                           |
| CR DS AS                                                                                                                                                                                                            | R              | TGGTGCAATTTCTGTGTTGGACGG                               |                           |
| AatII+TracrUPForw                                                                                                                                                                                                   | F              | TATTGACGTCCTCCGTAAACAACGTTGCAAATAATG                   | For pYZEJS079             |
| TracrPro+Sp25 AS                                                                                                                                                                                                    | R              | GTAAAGGTAATGCGCCGCGCATGAGTTTGGGATTCTA<br>GCCGTTGTGAG   |                           |
| Sp25+R Forw                                                                                                                                                                                                         | F              | TCATGCGCGGCGCATTACCTTTACGTTGTAGCTCCCTT<br>TCTCATTTCCGG |                           |
| PaclI+tracrend AS                                                                                                                                                                                                   | R              | TCGCTTAATTAATAAACGATGCCCTTAAAGCAGAAGC                  |                           |
| PaclI+trdel1 AS                                                                                                                                                                                                     | R              | TCGCTTAATTAATAAGCTTTAAGGGGCAGAGCGTTG                   | For pYZEJS162             |
| PaclI+trdel2 AS                                                                                                                                                                                                     | R              | TCGCTTAATTAACGGCACATCTTTTCAGACGGCC                     | For pYZEJS163             |
| PaclI+trdel3 AS                                                                                                                                                                                                     | R              | TCGCTTAATTAATCAGACGGCCTTATTGTAGCAAC                    | For pYZEJS164             |
| PaclI+trdel4 AS                                                                                                                                                                                                     | R              | TCGCTTAATTAATAATTGTAGCAACGTTCTCATTTTC                  | For pYZEJS165             |
| PaclI+trdel6 AS                                                                                                                                                                                                     | R              | TCGCTTAATTAATAAAGCAGAAGCTTTAAGGGGCAG                   | For pYZEJS176             |
| Hinddel5endPaclI Forw                                                                                                                                                                                               | F              | AGCTTCTGCTTTAAGGGGCATTAAT                              | For pYZEJS175             |
| Hinddel5endpaclI AS                                                                                                                                                                                                 | R              | TAATGCCCTTAAAGCAGA                                     |                           |
| Int 1 AS                                                                                                                                                                                                            | R              | GGGAGCTACAACGTAAAGGTAATGCG                             | For pYZEJS177             |
| OL+int1F                                                                                                                                                                                                            | F              | CCTTTACGTTGTAGCTCCCCGTTGCTACAATAAGGCC<br>GTCTG         |                           |
| Int 2 AS                                                                                                                                                                                                            | R              | ATTGTAGCAACGGTTCTCATTTTC                               | For pYZEJS178             |
| OL+int2F                                                                                                                                                                                                            | F              | ATGAGAACCGTTGCTACAATCAACGCTCTGCCCTTAA<br>AGCTTC        |                           |
| Int 3 AS                                                                                                                                                                                                            | R              | TTTCGGGAGCTACAACGTAAAGGTAATGCG                         | For pYZEJS179             |
| OL+int3F                                                                                                                                                                                                            | F              | CCTTTACGTTGTAGCTCCCCGAAACGTTGCTACAATAAG<br>GCCGTCTG    |                           |
| NmeCas9 Forw-RR                                                                                                                                                                                                     | F              | TACTTCCAATCCAATGCCATGGCTGCCTTCAAACC                    | For pYZEJS265             |
| NmeCas9 AS-RR                                                                                                                                                                                                       | R              | TTATCCACTTCCAATGTTTAAACGGACAGGCGG                      |                           |
| PGCC2 FwbeforeMCS                                                                                                                                                                                                   | F              | GCTCGAATTCGATCATATTCAATAACCC                           | PGCC2 based<br>sequencing |
| PGCC2 ASafterMCS                                                                                                                                                                                                    | R              | AGAACCATCCGTTCTGCTCTATACCCTCG                          |                           |
| <b>To construct plasmids with protospacer mutants and NmeCas9 mutants</b>                                                                                                                                           |                |                                                        |                           |
| All pGCC2-, pYZEJS040- and pMCSG7- based plasmids carrying point mutations in the protospacers, PAM or NmeCas9 were created by QuickChange mutagenesis and confirmed by sequencing. The oligos used are not listed. |                |                                                        |                           |
| <sup>(a)</sup> F, Forward; R, Reverse.                                                                                                                                                                              |                |                                                        |                           |

## SUPPLEMENTAL EXPERIMENTAL PROCEDURES

### Bacterial Strains and Growth Conditions

*N. meningitidis* 8013 (MC8013) and mutant derivatives used in this study are listed in Supplementary Table S1. Meningococcal strains were grown on GC Medium Base (GCB) (Difco) plates with appropriate antibiotics and Kellogg's supplements I and II (Sigma). All solid cultures were incubated at 37°C in a 5% CO<sub>2</sub> humidified atmosphere.

### Mutant Strain Construction

All mutant strains were confirmed by PCR and DNA sequencing. To create the unmarked  $\Delta$ *crispr* strain, we first transformed a streptomycin-resistant (Sm<sup>R</sup>) strain with plasmid pSmarHCamp/ $\Delta$ *crispr*/CAT-*rpsL*, in which a dual-marker cassette [CAT (chloramphenicol acetyltransferase, conferring chloramphenicol resistance) (Cm<sup>R</sup>) and wild-type *rpsL*] replaced the *crispr* locus. The resulting Sm<sup>S</sup> Cm<sup>R</sup> transformants were transformed with plasmid pSmarHCamp/ $\Delta$ *crispr*/Sall+SpeI. Sm<sup>R</sup> Cm<sup>S</sup> colonies were screened by PCR to confirm replacement of the dual marker cassette with the unmarked *crispr* deletion.

To generate complementation strains expressing sgRNAs, we generated sp 25 sgRNA variants and cloned them into plasmid pGCC2, transformed the resulting plasmids into the parental  $\Delta$ *crispr* $\Delta$ *tracr* strain, and selected erythromycin-resistant (Erm<sup>R</sup>) transformants.

### Recombinant NmeCas9 expression and purification

The NmeCas9 gene of MC8013 was cloned into the pMCSG7 vector using Ligation Independent Cloning (Stols et al., 2002). The resulting NmeCas9 protein contains an N-terminal His<sub>6</sub>-tag, followed by a Tobacco Etch Virus (TEV) protease site to remove the His-tag by TEV

cleavage. For protein expression, the plasmid was transformed into BL21(DE3) Rosetta cells. The cells were grown in terrific broth medium at 36 °C to an OD600 of ~0.8, transferred to ice to reduce the temperature to around 16°C, induced with 0.5 mM  $\beta$ -D-1-thiogalactopyranoside (IPTG), and grown overnight at 16°C for protein expression. Cell pellets were re-suspended in re-suspension buffer (50 mM TRIS pH 8, 500 mM NaCl, 10% glycerol, and 5 mM Imidazole) and stored at -80°C. For purification, cells were thawed and protease inhibitors [Benzimidazole (1 mM), Pepstatin (1  $\mu$ g/ml), and PMSF (1 mM)] were added to the cell suspension. The cells were then incubated while sequentially adding Lysozyme (0.625 mg/ml), Brij58 (0.1%), and DNase (0.02 mg/mL, along with 10 mM  $MgCl_2$ ), with 30 minutes of gentle rocking at 4°C for each step. This was followed by a gentle sonication of the cells. The cell lysate was spun at 35,000 rpm for 30 minutes and the supernatant was filtered through a 0.2  $\mu$ m filter. The salt concentration of the supernatant was adjusted to 1M NaCl, and 0.2% Polyethyleneimine (PEI) was added slowly to the supernatant while stirring at 4°C, for a total period of 30 minutes. The solution was spun at 18,000 rpm at 4°C for 30 minutes, during which NmeCas9 separated into the supernatant. Solid ammonium sulfate was added to the supernatant to a final concentration of 50% (29.1 g for a 100 ml solution) and stirred at 4°C for 30 minutes. The solution was spun at 18,000 rpm for 30 minutes and the majority of NmeCas9 settled in the pellet. The pellet was solubilized in Buffer A (re-suspension buffer supplemented with salt to a final 1 M NaCl concentration, along with 1 mM PMSF). The protein solution was loaded onto a Ni-NTA column that was equilibrated with the same buffer. After loading, the column was washed with around 500 mL of Buffer A to remove any unbound or loosely bound contaminating protein followed by 100 mL Buffer A supplemented with 20 mM Imidazole, and finally with Buffer A with 350 mM Imidazole to elute the protein. Protein was dialyzed into S-column buffer (20 mM HEPES pH 7.5, 250 mM KCl, 10% glycerol, 1 mM DTT, and 1 mM PMSF) and simultaneously incubated with TEV protease [(1:50 (mg/ml))] to cleave the His-tag. The protein was passed through a Ni-NTA column to deplete the His-tag and the uncleaved NmeCas9. The flow-through from the Ni-NTA column was loaded



onto a MonoS column and eluted by a salt gradient from 250 mM to 1.5 M KCl. The pure fractions were pooled and dialyzed into S200-column buffer (20 mM HEPES pH 7.5, 500 mM KCl, 10% glycerol, 1 mM DTT, and 1 mM PMSF). The protein was concentrated and loaded onto a gel filtration column (S200). Pure NmeCas9 protein fractions were pooled, concentrated to around 20 mg/ml, and stored at -80°C.

### **Plasmid Construction**

Plasmids used in this study are listed in Supplementary Table S2. *E. coli* Top10 competent cells (Invitrogen) were used for cloning. All plasmids were verified by DNA sequencing. Regular and overlapping PCRs for cloning were done using Platinum Pfx DNA Polymerase (Invitrogen). Protospacer plasmids [pGCC2 or pYZEJS040 (Zhang et al., 2013) derivatives] for in vitro cleavage and *N. meningitidis* transformation assays were constructed as described previously (Zhang et al., 2013). All PAM and seed mutants of the protospacer plasmids were created by QuikChange (Agilent) mutagenesis. Plasmids for creating *N. meningitidis*  $\Delta$ crispr $\Delta$ tracrRNA strains with sgRNA complementation were constructed by overlapping PCR or regular PCR and ligation as previously described (Zhang et al., 2013). The wild type NmeCas9 gene was cloned into the pMCSG7 vector to create the plasmid for overexpression of NmeCas9 protein, and derivative plasmids for mutant NmeCas9 proteins were constructed by QuikChange (Agilent) mutagenesis.

### **Binding of SSB and RecA proteins to ssDNA substrates**

FAM-labeled ssDNA oligonucleotide (IDT, Coralville IA) was incubated in standard cleavage buffer, with increasing concentrations of SSB (0.05, 0.5, 5, 50 ng/ $\mu$ L) or RecA (2, 20, 200 ng/ $\mu$ L) proteins (NEB) at 37°C for 10 min. For cleavage assays, small RNAs (500 nM) and NmeCas9 (500 nM) were then added to the reaction, incubated at 37°C for 30 min, and analyzed as in Fig.

4A. For EMSAs, half of the binding reaction was supplied with 10% glycerol and immediately analyzed as in Fig. 3C.

### **Electrophoretic Mobility Shift Assay (Fig. S3)**

RNAs (500 nM) were incubated with NmeCas9 (500nM) in standard cleavage buffer (without  $Mg^{2+}$ ) at room temperature for 8-10 min. The reactions were resolved by 6% Native PAGE at 4°C. RNAs were stained by SYBR Gold (Life Technologies) and visualized with an ImageQuant LAS 4000 imager. The “Control RNA” (kindly provided by W. Tang and C. C. Mello) is a 40-nt ssRNA complementary to a *C. elegans*-derived piRNA.

## SUPPLEMENTAL REFERENCES

Hou, Z., Zhang, Y., Propson, N.E., Howden, S.E., Chu, L.F., Sontheimer, E.J., and Thomson, J.A. (2013). Efficient genome engineering in human pluripotent stem cells using Cas9 from *Neisseria meningitidis*. *Proc. Natl. Acad. Sci. USA* *110*, 15644-15649.

Jinek, M., Chylinski, K., Fonfara, I., Hauer, M., Doudna, J.A., and Charpentier, E. (2012). A programmable dual-RNA-guided DNA endonuclease in adaptive bacterial immunity. *Science* *337*, 816-821.

Stols, L., Gu, M., Dieckman, L., Raffin, R., Collart, F.R., and Donnelly, M.I. (2002). A new vector for high-throughput, ligation-independent cloning encoding a tobacco etch virus protease cleavage site. *Protein Expr. Purif.* *25*, 8-15.

Zhang, Y., Heidrich, N., Ampattu, B.J., Gunderson, C.W., Seifert, H.S., Schoen, C., Vogel, J., and Sontheimer, E.J. (2013). Processing-independent CRISPR RNAs limit natural transformation in *Neisseria meningitidis*. *Mol. Cell* *50*, 488-503.
